# Supplementary material
Source: ML conference proceedings conference paper supplement (https://proceedings.neurips.cc/paper_files/paper/2022/hash/053a18c03e0844d0c484ba2861f8ae6c-Abstract.html)
Supplement: Supplementary file 1 [file 053a18c03e0844d0c484ba2861f8ae6c-Supplemental-Conference.zip]

Archive with 1 entries (1 files):
- MM_Former__camera_ready_supp.pdf
